# Supplementary material
Source: PubMed Central journal article supplement (PMC7548290)
Supplement: kfaa106_supplementary_data.pdf [file kfaa106_supplementary_data.pdf]

## **Supplementary Material**

### **Arsenic Directs Stem Cell Fate by Imparting Notch Signaling into the Extracellular Matrix Niche**

Teresa Anguiano<sup>1</sup>, Amrita Sahu<sup>2</sup>, Baoli Qian<sup>1</sup>, Wan-Yee Tang<sup>1</sup>, Fabrisia Ambrosio<sup>1,2,3,4</sup> & Aaron Barchowsky<sup>1,5\*</sup>

<sup>1</sup>Department of Environmental and Occupational Health, University of Pittsburgh,

<sup>2</sup>Department of Physical Medicine and Rehabilitation, University of Pittsburgh

<sup>3</sup>McGowan Institute for Regenerative Medicine, University of Pittsburgh

<sup>4</sup>Department of Bioengineering, University of Pittsburgh

<sup>5</sup>Department of Pharmacology and Chemical Biology, University of Pittsburgh

**Arsenic Directs Stem Cell Fate by Imparting Notch Signaling into the Extracellular Matrix Niche.**

**Anguiano et al.**

**Supplementary Information:**

**Supplemental Table 1: Antibodies used for imaging, functional assay, and immunoblotting**

| <b>Primary Antibody</b>             | <b>Host</b>      | <b>Company</b>              | <b>Catalogue No.</b> | <b>Dilution</b> |
|-------------------------------------|------------------|-----------------------------|----------------------|-----------------|
| Anti-Actin, $\alpha$ -Smooth Muscle | Mouse            | Sigma                       | A2547                | 1:250           |
| CD34 Antibody [EP373Y]              | Rabbit           | Abcam                       | ab81289              | 1:100           |
| Anti-Desmin                         | Rabbit           | Abcam                       | ab15200              | 1:1000          |
| Anti-DLL4                           | Rabbit           | Abcam                       | Ab7280               | 1:500           |
| DLL4 blocking antibody              | American hamster | eBiosciences / ThermoFisher | 16-5948-82           | 1:100           |
| Anti-PDGFR alpha [16A1]             | Mouse            | Abcam                       | ab96569              | 1:200           |
| PDGF Receptor $\alpha$ D1E1E XP(R)  | Rabbit           | Cell Signaling              | 3174S                | 1:250           |
| MyoD (G-1)                          | Mouse            | Santa-Cruz                  | sc377460             | 1:800           |
| Anti-activated Notch1               | Rabbit           | Abcam                       | Ab52301              | 1:200           |

| <b>Secondary Antibody</b>                    | <b>Company</b>                        | <b>Catalogue No.</b> | <b>Dilution</b> |
|----------------------------------------------|---------------------------------------|----------------------|-----------------|
| Alexa Fluor 488 Donkey anti Rabbit IgG (H+L) | Invitrogen / Thermo Fisher Scientific | A21206               | 1:2000          |
| Cy3 Conjugated Donkey anti Mouse Affinipure  | Jackson ImmunoResearch                | 715-165-151          | 1:700           |
| Alexa Fluor 647 Phalloidin                   | Invitrogen / ThermoFisher             | A22287               | 1:40            |
| Cy3 Goat anti Rabbit IgG (H+L)               | Invitrogen / ThermoFisher Scientific  | A10520               | 1:250           |
| IRDye® 800CW Donkey anti-Mouse IgG           | LI-COR Biosciences                    | 926-32212            | 1:20,000        |
| IRDye® 680LT Donkey anti-Rabbit IgG          | LI-COR Biosciences                    | 926-68023            | 1:20,000        |

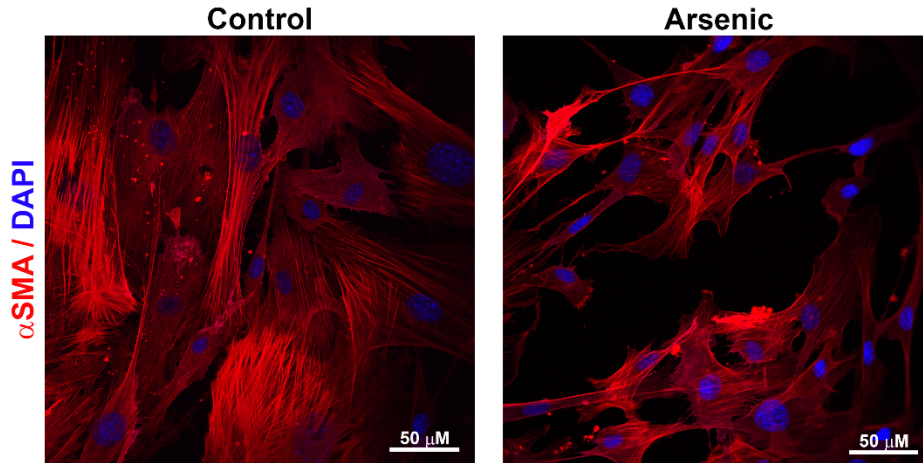

**Supplemental Figure 1: CTF Characterization:** CTF were isolated from hind limb muscles of two mice in each group. The cells were fixed 24 hours after being plated in cultures and immunostained with antibody to  $\alpha$ SMA. Confocal images were captured at 40x magnification. Greater than 95% of isolated cells were  $\alpha$ SMA in all cultures.

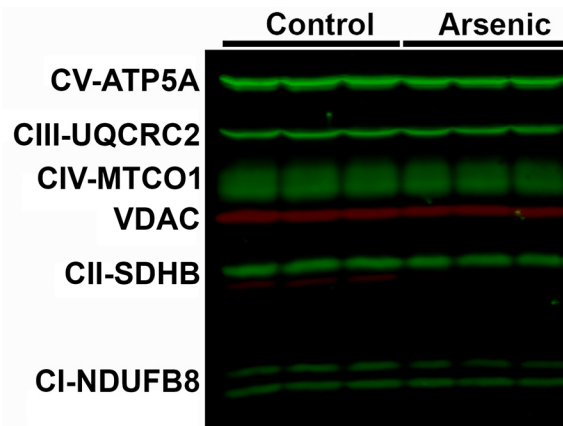

**Supplemental Figure 2: Effect of Arsenic on CTF mitochondrial respiratory protein expression:** Respiratory protein expression measured by immunoblotting in the additional three replicate cultures of CTF<sup>ctr</sup> and CTF<sup>ars</sup> (first three replicates shown in Figure 2B). The abundances of respiratory complex proteins (green) and VDAC (red) from all six replicate cultures are given in Table 1.

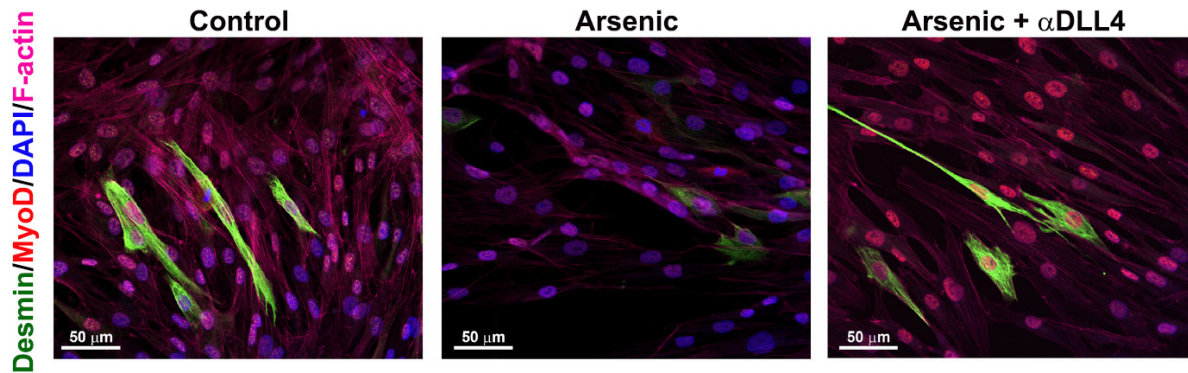

**Supplemental Figure 3: Effect of ECM DLL4 inhibition on hMuSC differentiation:** CTF<sup>ctr</sup> and CTF<sup>ars</sup> were cultured for 3 days to elaborate ECM. The cells were removed and the ECM was incubated with an antibody that blocks DLL4/Notch binding. After rinsing to remove unbound antibody, hMuSC were seeded and cultured in differentiation medium for 2 days before fixing and immunofluorescent imaging for desmin (green) and nuclear MyoD (red) expression. Nuclei were stained with DAPI (blue) and F-actin was stained with Alexa Fluor 647-phalloidin (magenta). Images were captured at 40x magnification.
